# Supplementary material for: Recent changes in summer Greenland blocking captured by none ofthe CMIP5 models
Source: Copernicus journal article supplement (doi:10.5194/tc-2018-91), 2018-05-15
Supplement: Supplementary file 1 [file tc-2018-91-supplement.pdf]

# **Supplementary Material of Recent changes in summer Greenland blocking captured by none of the CMIP5 models**

Edward Hanna <sup>1</sup>, Xavier Fettweis <sup>2</sup>, and Richard J. Hall <sup>1</sup>

<sup>1</sup>School of Geography and Lincoln Centre for Water and Planetary Health, University of Lincoln, UK

<sup>2</sup>Laboratory of Climatology, Department of Geography, University of Liège, Liège, Belgium

**Correspondence:** Edward Hanna (EHanna@lincoln.ac.uk)

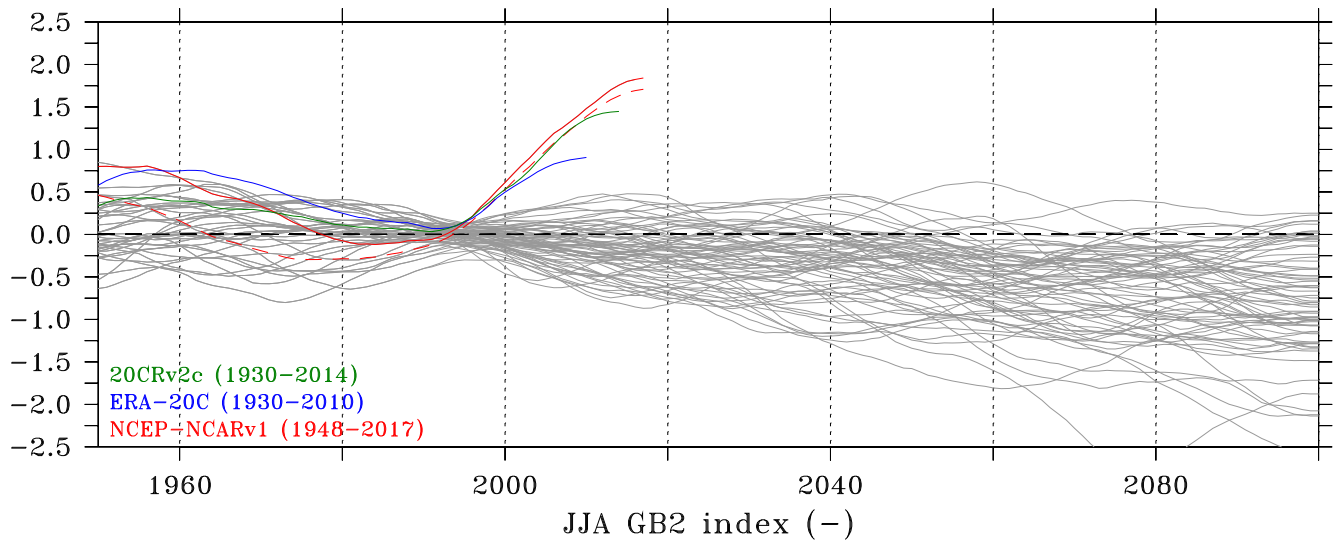

**Figure S1.** Same as Figure 1 but using a 30-year running mean.

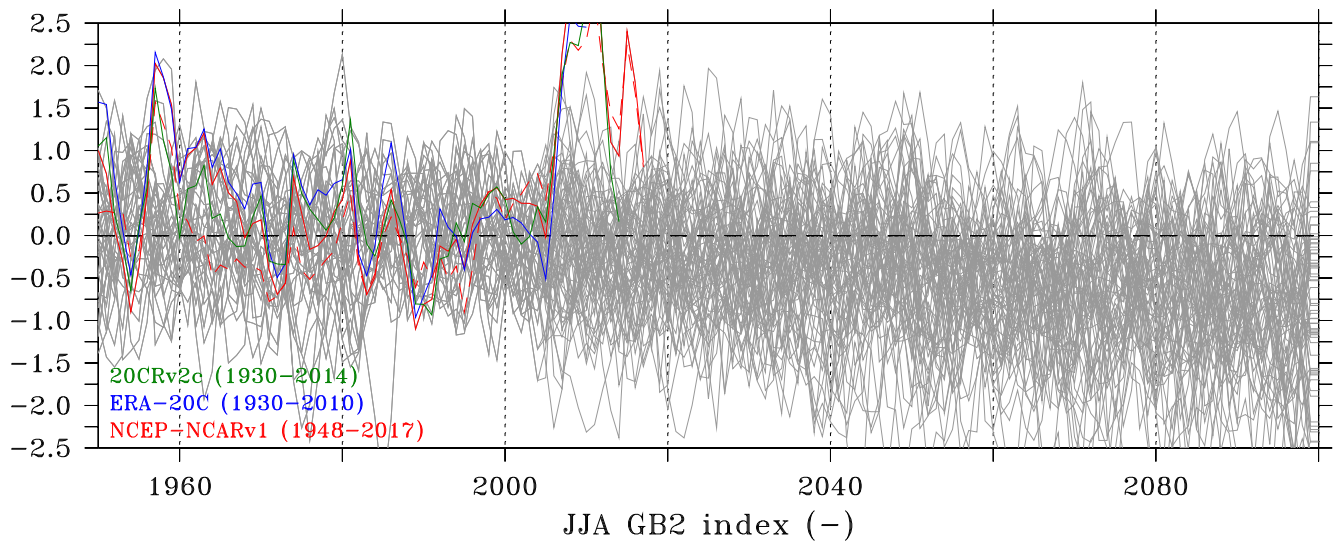

**Figure S2.** Same as Figure 1 but using a 3-year running mean.

**Table S1.** List of the 36 CMIP5 global models (run r1i1p1) used in this study.

| Model name   | Model name     |
|--------------|----------------|
| ACCESS1-0    | GISS-E2-H      |
| ACCESS1-3    | GISS-E2-R-CC   |
| bcc-csm1-1-m | GISS-E2-R      |
| bcc-csm1-1   | HadGEM2-AO     |
| CanESM2      | HadGEM2-CC     |
| CCSM4        | HadGEM2-ES     |
| CESM1-BGC    | inmcm4         |
| CESM1-CAM5   | IPSL-CM5A-LR   |
| CMCC-CM      | IPSL-CM5A-MR   |
| CMCC-CMS     | IPSL-CM5B-LR   |
| CNRM-CM5     | MIROC5         |
| EC-EARTH     | MIROC-ESM-CHEM |
| FGOALS-g2    | MIROC-ESM      |
| FIO-ESM      | MPI-ESM-LR     |
| GFDL-CM3     | MPI-ESM-MR     |
| GFDL-ESM2G   | MRI-CGCM3      |
| GFDL-ESM2M   | NorESM1-ME     |
| GISS-E2-H-CC | NorESM1-M      |
